# Supplementary material
Source: PubMed Central journal article supplement (PMC2911224)
Supplement: tjp0588-2255-SD1.pdf [file tjp0588-2255-SD1.pdf]

## Supplementary Figure 1

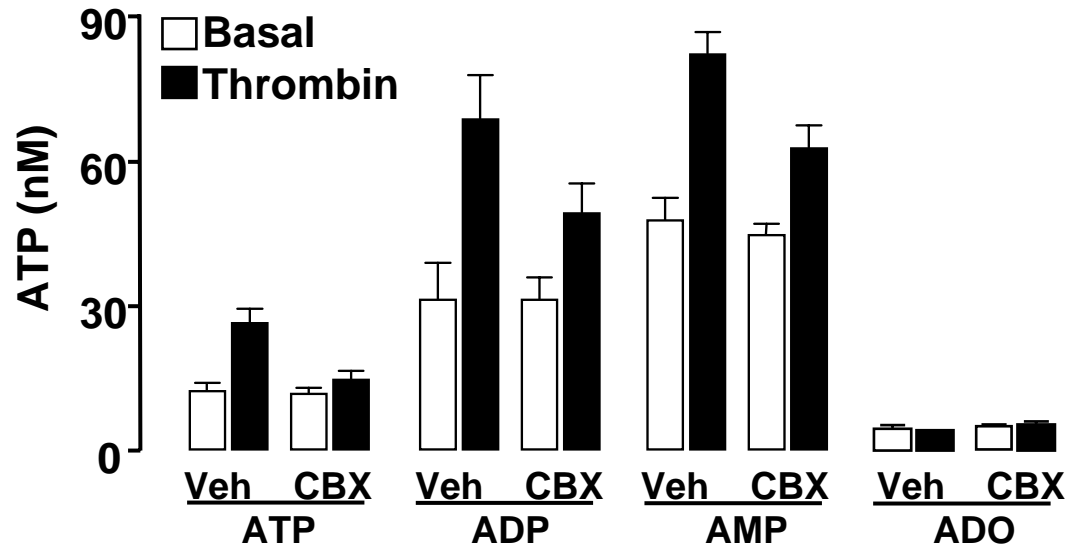

**Supplementary Figure 1. ATP release via pannexin/connexin hemichannels.** Calu-3 cells were stimulated with thrombin (50 nM, 5 min at 37°C) and the apical bath was collected and analyzed for adenylyl purines as in Fig. 9. The results are expressed as the mean  $\pm$  SEM n =4.
